# Supplementary material for: The Evolutionary Trend and Genomic Features of an Emerging Lineage of Elizabethkingia anophelis Strains in Taiwan
Source: PubMed Central journal article supplement (PMC8768576; doi:10.1128/spectrum.01682-21), 2022-01-19
Supplement: spectrum01682-21_supp_1_seq13.pdf [file spectrum01682-21_supp_1_seq13.pdf]

**Table S1. The *Elizabethkingia anophelis* isolates with available genome data included in the core-genome multi-locus sequence typing**

| Strain    | source        | Region                            | Level           | Size (Mb) | GC (%) | Accession number                     | Scaffolds | Genes | Proteins (CDS) |
|-----------|---------------|-----------------------------------|-----------------|-----------|--------|--------------------------------------|-----------|-------|----------------|
| R26       | Mosquito      | Stockholm, Sweden                 | Complete Genome | 4.06      | 35.5   | chromosome: NZ_CP023401.1/C3401.1    | 1         | 3741  | 3635           |
| DSM-23781 |               | Justus Liebig University, Germany | Contig          | 4.07      | 35.4   | FLST01                               | 58        | 3779  | 3675           |
| As1       | Mosquito      | US                                | Contig          | 3.59      | 35.5   | LFKT01                               | 12        | 3315  | 3237           |
| AR4-6     | Mosquito      | Sichuan, China                    | Complete Genome | 4.09      | 35.5   | chromosome: NZ_CP023404.1/CP023404.1 | 1         | 3785  | 3678           |
| AR6-8     | Mosquito      | Sichuan, China                    | Complete Genome | 4.09      | 35.5   | chromosome: NZ_CP023403.1/CP023403.1 | 1         | 3785  | 3678           |
| 277-17    | Human patient | Taiwan                            | Complete Genome | 4.00      | 35.6   | CP071549                             | 2         |       | 3842           |

|        |               |        |                 |      |      |          |   |  |      |
|--------|---------------|--------|-----------------|------|------|----------|---|--|------|
| 346-72 | Human patient | Taiwan | Complete Genome | 4.10 | 35.8 | CP071543 | 1 |  | 3960 |
| 347-96 | Human patient | Taiwan | Complete Genome | 4.10 | 35.8 | CP071540 | 1 |  | 3965 |
| 354-72 | Human patient | Taiwan | Complete Genome | 4.10 | 35.8 | CP071536 | 1 |  | 3963 |
| 354-87 | Human patient | Taiwan | Complete Genome | 4.10 | 35.9 | CP071535 | 1 |  | 3926 |
| 355-58 | Human patient | Taiwan | Complete Genome | 4.10 | 35.8 | CP071534 | 1 |  | 3963 |
| 356-17 | Human patient | Taiwan | Complete Genome | 4.10 | 35.8 | CP071533 | 1 |  | 3961 |
| 346-66 | Human patient | Taiwan | Complete Genome | 4.10 | 35.8 | CP071544 | 1 |  | 3966 |
| 347-10 | Human patient | Taiwan | Complete Genome | 4.10 | 35.8 | CP071542 | 1 |  | 3962 |
| 343-63 | Human patient | Taiwan | Complete Genome | 4.10 | 35.8 | CP071546 | 1 |  | 3951 |
| 347-50 | Human patient | Taiwan | Complete Genome | 4.10 | 35.9 | CP071541 | 1 |  | 3925 |
| 348-50 | Human patient | Taiwan | Complete Genome | 4.10 | 35.8 | CP071539 | 1 |  | 3961 |

|        |                     |                                         |                 |      |      |                                     |    |      |      |
|--------|---------------------|-----------------------------------------|-----------------|------|------|-------------------------------------|----|------|------|
| 349-83 | Human patient       | Taiwan                                  | Complete Genome | 4.10 | 35.8 | CP071538                            | 1  |      | 3967 |
| 351-72 | Human patient       | Taiwan                                  | Complete Genome | 4.10 | 35.8 | CP071537                            | 1  |      | 3964 |
| 362-2  | Human patient       | Taiwan                                  | Complete Genome | 4.10 | 35.8 | CP071532                            | 1  |      | 3962 |
| 367-19 | Human patient       | Taiwan                                  | Complete Genome | 4.10 | 35.8 | CP071531                            | 1  |      | 3967 |
| 296-96 | Human patient       | Taiwan                                  | Complete Genome | 4.20 | 35.8 | chromosome:NZ_CP046080.1/CP046080.1 | 1  | 3898 | 3779 |
| 344-1  | Human patient       | Taiwan                                  | Complete Genome | 4.10 | 35.9 | CP071545                            | 2  |      | 4017 |
| 2-62   | Suction Rotary knob | Taiwan                                  | Complete Genome | 4.10 | 35.8 | CP071551                            | 1  |      | 3982 |
| GX130  | Human patient       | Guangxi Zhuang Autonomous Region, China | Contig          | 3.87 | 35.6 | SYWB01                              | 38 | 3543 | 3452 |
| 313-22 | Human patient       | Taiwan                                  | Complete Genome | 4.00 | 35.8 | CP071547                            | 1  |      | 3799 |

|                     |                  |                                       |                    |      |      |                                             |    |      |      |
|---------------------|------------------|---------------------------------------|--------------------|------|------|---------------------------------------------|----|------|------|
| CSID_301<br>5183678 | Human<br>patient | Wisconsin,<br>US                      | Complete<br>Genome | 3.93 | 35.8 | chromosome:NZ_<br>CP014805.2/CP0<br>14805.2 | 1  | 3587 | 3483 |
| CSID_301<br>5183684 | Human<br>patient | Wisconsin,<br>US                      | Complete<br>Genome | 3.93 | 35.8 | chromosome:NZ_<br>CP015066.2/CP0<br>15066.2 | 1  | 3587 | 3481 |
| CSID_300<br>0521207 | Human<br>patient | Wisconsin,<br>US                      | Complete<br>Genome | 3.85 | 35.7 | chromosome:NZ_<br>CP015067.2/CP0<br>15067.2 | 1  | 3513 | 3412 |
| CSID_301<br>5183681 | Human<br>patient | Wisconsin,<br>US                      | Complete<br>Genome | 3.93 | 35.8 | chromosome:NZ_<br>CP015068.2/CP0<br>15068.2 | 1  | 3586 | 3482 |
| FDAARGO<br>S_132    | Human<br>patient | Washingto<br>n, US                    | Complete<br>Genome | 4.00 | 35.7 | chromosome:NZ_<br>CP014020.1/CP0<br>14020.1 | 1  | 3675 | 3565 |
| FDAARGO<br>S_134    | Human<br>patient | Washingto<br>n, US                    | Complete<br>Genome | 4.00 | 35.7 | chromosome:NZ_<br>CP014021.1/CP0<br>14021.1 | 1  | 3676 | 3567 |
| PHOL-090            | Human<br>patient | Greater<br>Toronto<br>Area,<br>Canada | Contig             | 4.00 | 35.5 | RSAZ01                                      | 27 | 3679 | 3556 |

|                  |               |                      |                 |      |      |                                     |    |      |      |
|------------------|---------------|----------------------|-----------------|------|------|-------------------------------------|----|------|------|
| F3543            | Human patient | Florida, US          | Complete Genome | 3.97 | 35.6 | chromosome:NZ_CP014340.1/CP014340.1 | 1  | 3638 | 3522 |
| 3375             | Human patient | South California, US | Complete Genome | 4.01 | 35.7 | chromosome:NZ_CP016373.1/CP016373.1 | 1  | 3704 | 3583 |
| FDAARGO S_198    | Human patient | Sweden               | Complete Genome | 4.07 | 35.8 | chromosome:NZ_CP023010.2/CP023010.2 | 1  | 3737 | 3614 |
| BP8467           | Human patient | Vellore, India       | Contig          | 3.86 | 35.6 | VTFI01                              | 30 | 3527 | 3394 |
| SP4182           | Human patient | Vellore, India       | Contig          | 3.83 | 35.5 | PXJH01                              | 47 | 3619 | 873  |
| 40313151         | Human patient | US                   | Contig          | 4.10 | 35.6 | QNTY01                              | 18 | 3833 | 3735 |
| E6809            | Human patient | California, US       | Complete Genome | 4.12 | 35.6 | chromosome:NZ_CP014339.1/CP014339.1 | 1  | 3821 | 3703 |
| 6499925          | Human patient | US                   | Contig          | 3.96 | 35.8 | QNTZ01                              | 16 | 3641 | 3538 |
| CSID_300 0516074 | Human patient | Illinois, US         | Contig          | 4.05 | 35.7 | MAHA01                              | 17 | 3744 | 3639 |

|                 |               |                                       |                 |      |      |          |    |      |      |
|-----------------|---------------|---------------------------------------|-----------------|------|------|----------|----|------|------|
| CIP111067       |               | Institut Pasteur, Paris               | Scaffold        | 3.85 | 35.7 | FTQZ01   | 65 | 3508 | 3414 |
| PHOL-104        | Human patient | Greater Toronto Area, Canada          | Contig          | 3.84 | 35.6 | RSAW01   | 43 | 3497 | 3400 |
| CSID_3000516810 | Human patient | Arkansas, US                          | Contig          | 3.87 | 35.6 | MAHH01   | 25 | 3530 | 3440 |
| Ea_2-8          | Tap water     | Taiwan                                | Complete Genome | 4.00 | 35.6 | CP071530 | 1  |      | 3751 |
| PW2806          |               | European Bioinformatics Institute, UK | Scaffold        | 3.91 | 35.9 | CBYD01   | 42 | 3616 | 3494 |
| PW2809          |               | European Bioinformatics Institute, UK | Scaffold        | 3.92 | 35.8 | CBYE01   | 32 | 3623 | 3499 |

|                     |                                                                                    |                         |                 |      |      |                                     |    |      |      |
|---------------------|------------------------------------------------------------------------------------|-------------------------|-----------------|------|------|-------------------------------------|----|------|------|
| Ea_0422             | Human patient                                                                      | Florida, US             | Complete Genome | 3.99 | 35.6 | chromosome:NZ_CP016370.1/CP016370.1 | 1  | 3698 | 3585 |
| CIP60.58            |                                                                                    | Institut Pasteur, Paris | Contig          | 3.96 | 35.6 | FTQY01                              | 24 | 3679 | 3581 |
| CSID_301<br>5183679 | Human patient                                                                      | Wisconsin, US           | Contig          | 3.84 | 35.6 | MAHO01                              | 23 | 3567 | 3472 |
| CSID_301<br>5183680 | Human patient                                                                      | Wisconsin, US           | Contig          | 4.00 | 35.5 | MAHP01                              | 38 | 3711 | 3605 |
| JUNP 353            | Human patient                                                                      | Kathmandu, Nepal        | Complete Genome | 4.32 | 35.8 | chromosome:NZ_AP022313.1/AP022313.1 | 1  | 4049 | 3897 |
| NUH4                | hand hygiene sink aerator of the neonatal ICU ward of National University Hospital | Singapore               | Contig          | 4.24 | 35.6 | ASYI01                              | 50 | 3943 | 3831 |

|              |                           |                                       |                 |      |      |                                     |     |      |      |
|--------------|---------------------------|---------------------------------------|-----------------|------|------|-------------------------------------|-----|------|------|
| NUHP1        | Human patient             | Singapore                             | Complete Genome | 4.37 | 35.6 | chromosome:NZ_CP007547.1/CP007547.1 | 1   | 4040 | 3915 |
| NUHP3        | Human patient             | Singapore                             | Contig          | 4.33 | 35.5 | ASYG01                              | 71  | 4026 | 3909 |
| NUH1         | hand hygiene sink aerator | Singapore                             | Contig          | 4.33 | 35.6 | ASYH01                              | 59  | 4026 | 3908 |
| NUHP2        | Human patient             | Singapore                             | Contig          | 4.33 | 35.5 | ASYF01                              | 59  | 4026 | 3915 |
| 12012-2 PRCM | Human patient             | Fujian Quanzhou Hospital, China       | Contig          | 4.02 | 35.6 | LPXG01                              | 83  | 3711 | 3595 |
| LDVH-AR107   | <i>Cyprinus carpio</i>    | France                                | Scaffold        | 3.99 | 35.7 | FTPG01                              | 105 | 3667 | 3555 |
| Po0527107    |                           | European Bioinformatics Institute, UK | Contig          | 4.03 | 35.5 | CCAC01                              | 89  | 3708 | 3601 |
| V0378064     |                           | European Bioinforma                   | Scaffold        | 4.04 | 35.7 | CCAB01                              | 213 | 3735 | 3627 |



|                     |                              |                                       |                    |      |      |                                             |    |      |      |
|---------------------|------------------------------|---------------------------------------|--------------------|------|------|---------------------------------------------|----|------|------|
|                     |                              | tics<br>Institute,<br>UK              |                    |      |      |                                             |    |      |      |
| CSID_301<br>5183686 | Human<br>patient             | Wisconsin,<br>US                      | Contig             | 4.20 | 35.6 | MAHR01                                      | 49 | 3908 | 3809 |
| NUH11               | hand hygiene<br>sink aerator | Singapore                             | Contig             | 4.09 | 35.6 | ASYK01                                      | 59 | 3791 | 3676 |
| NUH6                | hand hygiene<br>sink aerator | Singapore                             | Contig             | 4.12 | 35.6 | ASYJ01                                      | 74 | 3847 | 3733 |
| EM361-97            | Human<br>patient             | Kaohsiung,<br>Taiwan                  | Scaffold           | 4.08 | 35.7 | LWDS00000000.<br>1                          | 18 | 3763 | 3634 |
| FMS-007             | Human<br>patient             | China                                 | Complete<br>Genome | 3.94 | 35.6 | chromosome:NZ_<br>CP006576.1/CP0<br>06576.1 | 1  | 3611 | 3501 |
| Ea_2-14             | Tap water                    | Taiwan                                | Complete<br>Genome | 4.00 | 35.5 | CP071550                                    | 1  |      | 3725 |
| 502                 | Human<br>patient             | Birmingham,<br>UK                     | Contig             | 3.96 | 35.5 | AVCQ01                                      | 21 | 3642 | 3537 |
| PHOL-515            | Human<br>patient             | Greater<br>Toronto<br>Area,<br>Canada | Contig             | 4.11 | 35.4 | RSAY01                                      | 55 | 3765 | 3634 |

|                     |                           |                                       |            |      |      |                        |     |      |      |
|---------------------|---------------------------|---------------------------------------|------------|------|------|------------------------|-----|------|------|
| PW2810              |                           | European Bioinformatics Institute, UK | Scaffold   | 3.98 | 35.5 | CBYF01                 | 38  | 3614 | 3481 |
| CIP111046           |                           | Institut Pasteur, Paris               | Scaffold   | 3.96 | 35.6 | FTRB01                 | 41  | 3619 | 3522 |
| PHOL-785            | Human patient             | Greater Toronto Area, Canada          | Contig     | 4.06 | 35.6 | RSAV01                 | 15  | 3707 | 3603 |
| CSID_300<br>0516978 | Human patient             | California, US                        | Contig     | 3.99 | 35.5 | MAHJ01                 | 16  | 3647 | 3551 |
| CSID_300<br>0517066 | Human patient             | Texas, US                             | Contig     | 3.96 | 35.6 | MAHL01                 | 18  | 3631 | 3540 |
| Endophthalmitis     | Human patient             | Puttaparthi, India                    | Contig     | 4.02 | 35.5 | JSAA01                 | 167 | 3729 | 2302 |
| Ngousso             | <i>Anopheles coluzzii</i> | Cameroon                              | Chromosome | 4.24 | 35.3 | chromosome: CP034594.1 |     |      |      |

|                     |                                 |                                       |                    |      |      |                                             |    |      |      |
|---------------------|---------------------------------|---------------------------------------|--------------------|------|------|---------------------------------------------|----|------|------|
| JM-87               | Corn zea<br>mays                | Alabama,<br>US                        | Complete<br>Genome | 4.18 | 35.5 | chromosome:NZ_<br>CP016372.1/CP0<br>16372.1 | 1  | 3837 | 3695 |
| F3201               | Human<br>patient                | Kuwait                                | Complete<br>Genome | 4.28 | 35.5 | chromosome:NZ_<br>CP016374.1/CP0<br>16374.1 | 2  | 3927 | 3797 |
| PHOL-537            | Human<br>patient                | Greater<br>Toronto<br>Area,<br>Canada | Contig             | 4.15 | 35.4 | RSAX01                                      | 38 | 3788 | 3676 |
| B2D                 |                                 | Malaysia                              | Contig             | 3.94 | 35.5 | JNCG01                                      | 50 | 3589 | 3501 |
| OSVUM1              | <i>Equine Stall</i>             | Oklahoma,<br>US                       | Contig             | 4.14 | 35.5 | PJMA01                                      | 5  | 3778 | 3653 |
| OSVUM2              | <i>Equus ferus<br/>caballus</i> | Oklahoma,<br>US                       | Contig             | 4.10 | 35.4 | PJLZ01                                      | 9  | 3754 | 3644 |
| CSID_300<br>0653323 | Human<br>patient                | Tennessee<br>, US                     | Contig             | 4.18 | 35.4 | NWMM01                                      | 35 | 3833 | 3721 |
| CSID_300<br>0726633 | Human<br>patient                | Illinois, US                          | Contig             | 4.18 | 35.4 | NWMI01                                      | 43 | 3832 | 3710 |
| CSID_300<br>0726811 | Human<br>patient                | Minnesota,<br>US                      | Contig             | 4.18 | 35.4 | NWMH01                                      | 28 | 3829 | 3710 |

**Table S2. The genomic island prediction results regarding to the seven genomic regions (GRs) of the *Elizabethkingia anophelis* 296-96 genome**

| Genomic region | SIGI-HMM (start-end)                                                                                            | IslandPath-DIMOB (start-end) |
|----------------|-----------------------------------------------------------------------------------------------------------------|------------------------------|
| GR1            | 562,287-566,801                                                                                                 |                              |
| GR2            |                                                                                                                 |                              |
| GR3            |                                                                                                                 | 1,419,188-1,447,202          |
| GR4            | 1,681,211-1,711,208<br>1,713,464-1,719,154<br>1,729,117-1,736,020                                               | 1,677,749-1,712,346          |
| GR5            |                                                                                                                 |                              |
| GR6            | 3,690,665-3,695,482<br>3,699,314-3,705,182<br>3,718,986-3,730,938<br>3,750,559-3,757,860<br>3,773,194-3,777,216 | 3,689,204-3,780,934          |
| GR7            | 4,126,500-4,131,283                                                                                             | 4,105,728-4,113,454          |

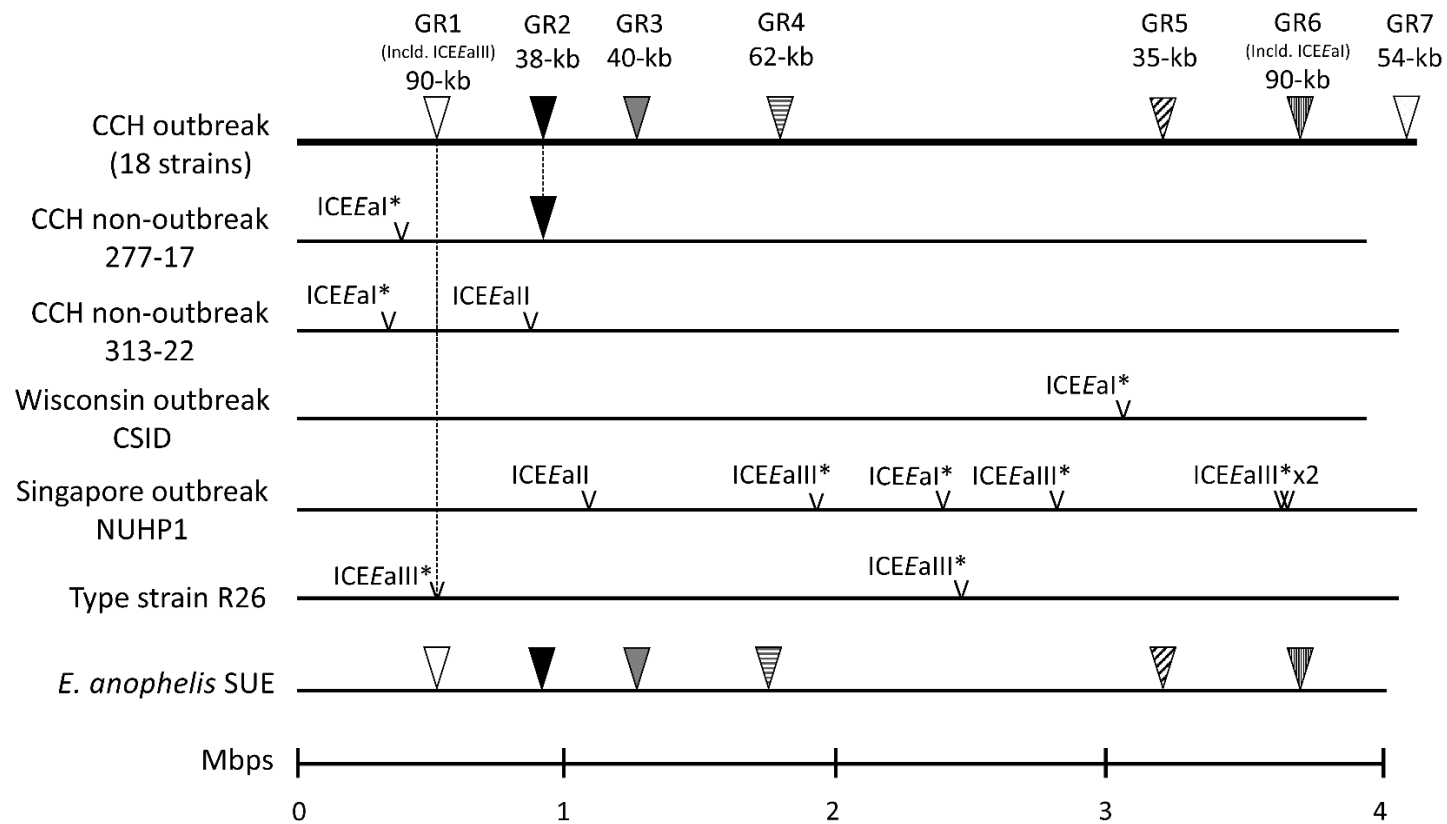

**Figure S1.** Illustration of seven genomic regions (GRs, triangle) among *Elizabethkingia anophelis* strains including Changhua Christian Hospital (CCH) strains, outbreak strains from Wisconsin and Singapore, R26 and *E. anophelis* SUE. All 18 outbreak

strains had GR1 to GR6 but GR7 only presented in *E. anophelis* 2-62, 344-1 and 296-96. GR1 included integrative and conjugative elements (ICEs) ICEEaIII and GR6 included ICEEaI. Three types of ICEs were marked in all *E. anophelis* genomes at the locus of insertion (arrow). \*ICEs with different cargo gene from the ICEs in the CCH outbreak strains.

## ICEEal

CSID\_3015183678 62 kbp

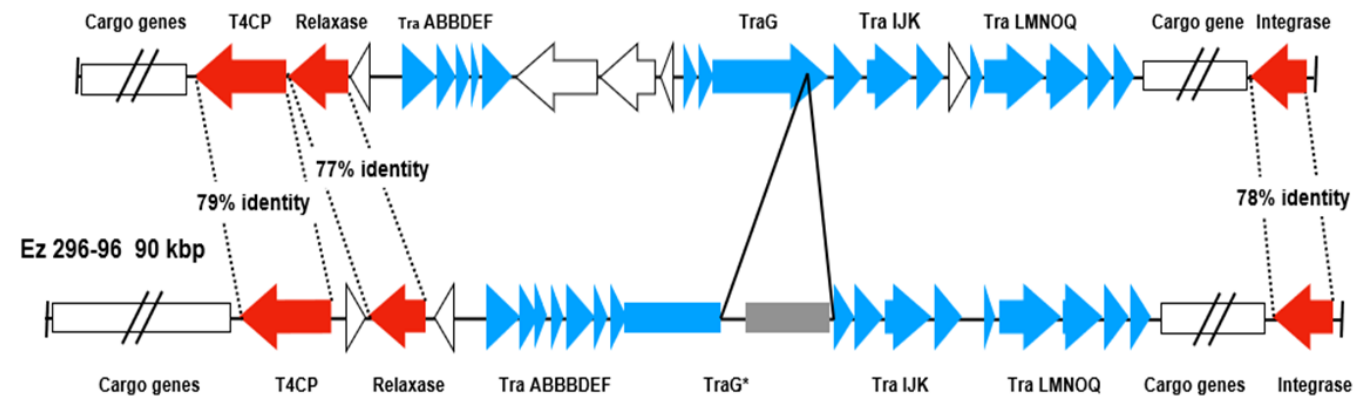

**Figure S2.** The comparison of the gene structure of integrative and conjugative elements (ICEEal) between the *Elizabethkingia anophelis* 296-96 in our study and the Wisconsin strain (CSID\_3015183678).

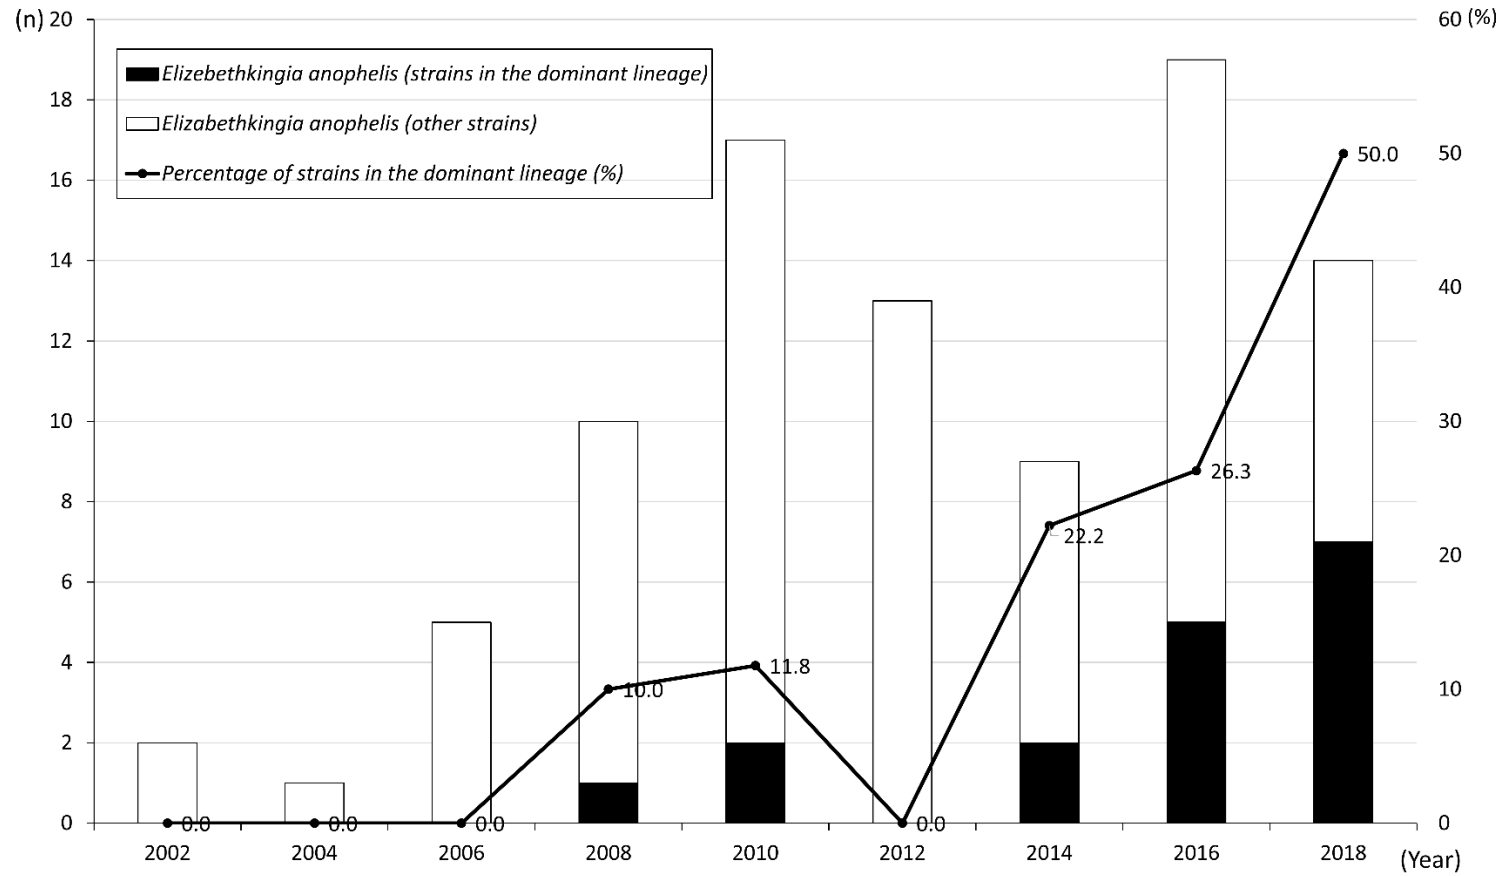

**Figure S3.** The annual number of *Elizabethkingia anophelis* strains in the Taiwan Surveillance of Antimicrobial Resistance (TSAR) program from 2002 to 2018 and the percentage of *E. anophelis* strains belonging to the dominant lineage
